# Supplementary material for: Effects of strong coordination bonds at the axial or equatorial positions on magnetic relaxation for pentagonal bipyramidal dysprosium(iii) single-ion magnets
Source: Royal Society of Chemistry journal article supplement (doi:10.1039/d2dt02402k), 2022-01-01
Supplement: d2dt02402k1.pdf [file d2dt02402k1.pdf]

Electronic Supplementary Information

**Effect of strong coordination bonds at axial or equatorial positions on magnetic relaxation for pentagonal bipyramidal dysprosium(III) single-ion magnets**

Min Li,<sup>a</sup> Jiayi Han,<sup>a</sup> Haipeng Wu,<sup>a\*</sup> Yien Du,<sup>a</sup> Yufang Liu,<sup>a</sup> Yongqiang Chen<sup>a\*</sup> and Sanping Chen<sup>b\*</sup>

<sup>a</sup> *Department of Chemistry and Chemical Engineering, Jinzhong University, Jinzhong, 030619, China.*

<sup>b</sup> *Key Laboratory of Synthetic and Natural Functional Molecule Chemistry of Ministry of Education, College of Chemistry and Materials Science, Northwest University, Xi'an, 710127, China*

**Table S1.** Crystal data and structure refinement summary for complexes **1-3**.

|                                                                 | <b>1</b>                                                                        | <b>2</b>                                                                        | <b>3</b>                                                                                        |
|-----------------------------------------------------------------|---------------------------------------------------------------------------------|---------------------------------------------------------------------------------|-------------------------------------------------------------------------------------------------|
| Empirical formula                                               | C <sub>20</sub> H <sub>24</sub> Cl <sub>3</sub> DyN <sub>6</sub> O <sub>4</sub> | C <sub>20</sub> H <sub>22</sub> Cl <sub>2</sub> DyN <sub>6</sub> O <sub>3</sub> | C <sub>96</sub> H <sub>92</sub> Cl <sub>9</sub> Dy <sub>3</sub> N <sub>30</sub> O <sub>28</sub> |
| Formula weight                                                  | 681.3                                                                           | 627.83                                                                          | 2920.54                                                                                         |
| Crystal system                                                  | 296.15                                                                          | 293(2)                                                                          | 293(2)                                                                                          |
| Temperature (K)                                                 | monoclinic                                                                      | monoclinic                                                                      | triclinic                                                                                       |
| Space group                                                     | P2 <sub>1</sub> /c                                                              | P2 <sub>1</sub> /c                                                              | p $\bar{1}$                                                                                     |
| <i>a</i> (Å)                                                    | 9.6107(18)                                                                      | 9.6018(2)                                                                       | 11.2799(3)                                                                                      |
| <i>b</i> (Å)                                                    | 22.067(4)                                                                       | 21.7017(5)                                                                      | 21.7618(6)                                                                                      |
| <i>c</i> (Å)                                                    | 13.874(3)                                                                       | 13.7591(3)                                                                      | 25.8284(7)                                                                                      |
| $\alpha$ (°)                                                    | 90                                                                              | 90                                                                              | 73.820(2)                                                                                       |
| $\beta$ (°)                                                     | 107.554(3)                                                                      | 107.146(2)                                                                      | 82.393(2)                                                                                       |
| $\gamma$ (°)                                                    | 90                                                                              | 90                                                                              | 82.882(2)                                                                                       |
| <i>V</i> (Å <sup>3</sup> )                                      | 2805.4(10)                                                                      | 2739.63(11)                                                                     | 6010.1(3)                                                                                       |
| <i>Z</i>                                                        | 4                                                                               | 4                                                                               | 2                                                                                               |
| <i>D<sub>c</sub></i> (g m <sup>-3</sup> )                       | 1.613                                                                           | 1.522                                                                           | 1.614                                                                                           |
| $\mu$ (mm <sup>-1</sup> )                                       | 2.984                                                                           | 16.636                                                                          | 12.368                                                                                          |
| <i>F</i> (000)                                                  | 1340                                                                            | 1232                                                                            | 2906                                                                                            |
| Crystal size (mm)                                               | 0.16×0.14×0.12                                                                  | 0.15×0.13×0.13                                                                  | 0.14×0.06×0.05                                                                                  |
| Reflns                                                          | 15119/5926                                                                      | 18089/4852                                                                      | 65718/21242                                                                                     |
| <i>R</i> <sub>int</sub>                                         | 0.0675                                                                          | 0.0801                                                                          | 0.0783                                                                                          |
| GOF on <i>F</i> <sup>2</sup>                                    | 1.0855                                                                          | 1.095                                                                           | 1.008                                                                                           |
| <i>R</i> <sub>1</sub> <sup>a</sup> [ <i>I</i> > 2σ( <i>I</i> )] | 0.0691                                                                          | 0.0610                                                                          | 0.0625                                                                                          |
| <i>wR</i> <sub>2</sub> <sup>b</sup> (all data)                  | 0.1571                                                                          | 0.1557                                                                          | 0.1887                                                                                          |
| CCDC                                                            | 2108069                                                                         | 2108068                                                                         | 2108070                                                                                         |

<sup>a</sup> $R_1 = \Sigma(|F_o| - |F_c|) / \Sigma |F_o|$ . <sup>b</sup> $wR_2 = [\Sigma w(F_o^2 - F_c^2)^2 / \Sigma w(F_o^2)^2]^{1/2}$

**Table S2** Selected bond lengths (Å) and bond angles (°) for **1-3**.

| Complex 1   |            |            |           |
|-------------|------------|------------|-----------|
| Dy1-C11     | 2.599(2)   | N3-Dy1-C11 | 86.59(19) |
| Dy1-C12     | 2.647(3)   | N3-Dy1-C12 | 85.98(19) |
| Dy1-O1      | 2.150(4)   | N3-Dy1-N1  | 133.0(2)  |
| Dy1-N1      | 2.534(7)   | N3-Dy1-N4  | 64.5(2)   |
| Dy1-N3      | 2.503(7)   | N3-Dy1-N2  | 67.8(2)   |
| Dy1-N4      | 2.536(7)   | N4-Dy1-C11 | 95.98(19) |
| Dy1-N2      | 2.505(7)   | N4-Dy1-C12 | 87.68(19) |
| C11-Dy1-C12 | 169.34(9)  | N2-Dy1-C11 | 84.3(2)   |
| O1-Dy1-C11  | 101.30(17) | N2-Dy1-C12 | 85.8(2)   |
| O1-Dy1-C12  | 89.20(18)  | N2-Dy1-N1  | 65.2(2)   |
| O1-Dy1-N1   | 83.0(2)    | N2-Dy1-N4  | 132.1(2)  |
| O1-Dy1-N3   | 143.7(2)   | N1-Dy1-C11 | 88.25(19) |
| O1-Dy1-N4   | 79.4(2)    | N1-Dy1-C12 | 91.25(19) |
| O1-Dy1-N2   | 147.6(2)   | N1-Dy1-N4  | 162.4(2)  |
| Complex 2   |            |            |           |
| Dy1-C11     | 2.593(2)   | N4-Dy1-C11 | 88.22(18) |
| Dy1-C12     | 2.637(2)   | N4-Dy1-C12 | 90.69(19) |
| Dy1-O1      | 2.131(6)   | N4-Dy1-N1  | 162.9(2)  |
| Dy1-N1      | 2.542(7)   | N2-Dy1-C12 | 87.31(17) |
| Dy1-N2      | 2.498(6)   | N2-Dy1-N1  | 63.9(2)   |
| Dy1-N3      | 2.513(7)   | N2-Dy1-N3  | 68.1(2)   |
| Dy1-N4      | 2.537(7)   | N2-Dy1-N4  | 133.1(3)  |
| C11-Dy1-C12 | 171.36(10) | N3-Dy1-C11 | 85.07(19) |
| O1-Dy1-C11  | 96.91(18)  | N3-Dy1-C12 | 86.70(19) |
| O1-Dy1-C12  | 91.44(19)  | N3-Dy1-N1  | 131.8(2)  |
| O1-Dy1-N1   | 80.6(2)    | N3-Dy1-N4  | 65.0(3)   |
| O1-Dy1-N2   | 144.5(2)   | N1-Dy1-C11 | 96.11(18) |

|                  |           |             |           |
|------------------|-----------|-------------|-----------|
| O1-Dy1-N3        | 147.3(2)  | N1-Dy1-Cl2  | 87.42(19) |
| O1-Dy1-N4        | 82.4(2)   | N2-Dy1-Cl1  | 87.18(17) |
| <hr/>            |           |             |           |
| <b>Complex 3</b> |           |             |           |
| <hr/>            |           |             |           |
| Dy2-O20          | 2.192(4)  | O17-Dy2-N15 | 147.8(2)  |
| Dy2-O17          | 2.169(5)  | O14-Dy2-O20 | 172.5(2)  |
| Dy2-O14          | 2.177(4)  | O14-Dy2-N13 | 85.46(18) |
| Dy2-N13          | 2.550(6)  | O14-Dy2-N14 | 91.5(2)   |
| Dy2-N14          | 2.543(7)  | O14-Dy2-N16 | 90.7(2)   |
| Dy2-N16          | 2.553(7)  | O14-Dy2-N15 | 83.1(2)   |
| Dy2-N15          | 2.530(7)  | N13-Dy2-N16 | 162.3(2)  |
| Dy1-O11          | 2.176(4)  | N14-Dy2-N13 | 64.7(2)   |
| Dy1-O6           | 2.169(5)  | N14-Dy2-N16 | 132.8(2)  |
| Dy1-O1           | 2.190(5)  | N15-Dy2-N13 | 130.1(2)  |
| Dy1-N1           | 2.546(6)  | N15-Dy2-N14 | 67.3(2)   |
| Dy1-N4           | 2.564(6)  | N15-Dy2-N16 | 66.2(3)   |
| Dy1-N3           | 2.520(6)  | O6-Dy1-N3   | 146.6(2)  |
| Dy1-N2           | 2.514(7)  | O6-Dy1-N2   | 145.4(2)  |
| Dy3-O23          | 2.210(5)  | O1-Dy1-N1   | 99.5(2)   |
| Dy3-O31          | 2.171(5)  | O1-Dy1-N4   | 85.2(2)   |
| Dy3-N24          | 2.515(6)  | O1-Dy1-N3   | 89.5(2)   |
| Dy3-N23          | 2.533(7)  | N24-Dy3-N23 | 64.8(2)   |
| Dy3-O28          | 2.216(7)  | O28-Dy3-N24 | 142.4(2)  |
| Dy3-N25          | 2.489(8)  | O28-Dy3-N23 | 79.7(3)   |
| Dy3-N26          | 2.497(9)  | N26-Dy3-N23 | 159.9(3)  |
| O17-Dy2-N16      | 81.6(2)   | O1-Dy1-N2   | 84.7(3)   |
| O11-Dy1-O1       | 171.0(2)  | N1-Dy1-N4   | 163.4(2)  |
| O11-Dy1-N1       | 87.68(19) | N3-Dy1-N1   | 130.7(2)  |
| O11-Dy1-N4       | 89.44(19) | O23-Dy3-N23 | 99.0(2)   |

|             |          |             |           |
|-------------|----------|-------------|-----------|
| O11-Dy1-N3  | 81.7(2)  | O23-Dy3-O28 | 89.1(2)   |
| O11-Dy1-N2  | 93.6(2)  | O23-Dy3-N25 | 87.3(2)   |
| O6-Dy1-O11  | 95.0(2)  | O20-Dy2-N13 | 95.28(19) |
| O6-Dy1-O1   | 91.5(3)  | O20-Dy2-N14 | 82.1(2)   |
| N2-Dy1-N1   | 64.9(2)  | O20-Dy2-N16 | 90.7(2)   |
| N2-Dy1-N4   | 131.6(2) | O20-Dy2-N15 | 90.8(2)   |
| N2-Dy1-N3   | 67.9(2)  | O17-Dy2-O20 | 89.7(2)   |
| O23-Dy3-N24 | 84.8(2)  | O17-Dy2-O14 | 97.8(2)   |
| O23-Dy3-N26 | 89.5(3)  | O17-Dy2-N13 | 81.8(2)   |
| O6-Dy1-N1   | 82.0(2)  | O17-Dy2-N14 | 144.4(2)  |
| O6-Dy1-N4   | 82.0(2)  | O31-Dy3-O23 | 170.7(2)  |
| N3-Dy1-N4   | 64.8(2)  | O31-Dy3-N24 | 90.6(2)   |
| O28-Dy3-N25 | 147.9(3) | O31-Dy3-N23 | 86.3(2)   |
| O28-Dy3-N26 | 82.3(4)  | O31-Dy3-O28 | 99.4(2)   |
| N25-Dy3-N24 | 69.0(2)  | O31-Dy3-N25 | 83.5(2)   |
| N25-Dy3-N23 | 132.4(3) | O31-Dy3-N26 | 87.9(2)   |
| N25-Dy3-N26 | 65.8(4)  | N26-Dy3-N24 | 134.6(3)  |

**Table S3.** Shape analysis for the metal centers of complexes **1-3**.

| complex <b>1</b> | HPY-7  | PBPY-7 | COC-7 | CTPR-7 | JPBPY-7 | JETPY-7 |
|------------------|--------|--------|-------|--------|---------|---------|
| Dy1              | 26.147 | 0.679  | 8.327 | 6.483  | 5.487   | 23.929  |
| complex <b>2</b> | HPY-7  | PBPY-7 | COC-7 | CTPR-7 | JPBPY-7 | JETPY-7 |
| Dy1              | 25.932 | 0.664  | 7.916 | 6.140  | 5.456   | 23.471  |
| complex <b>3</b> | HPY-7  | PBPY-7 | COC-7 | CTPR-7 | JPBPY-7 | JETPY-7 |
| Dy1              | 22.968 | 1.260  | 5.720 | 4.655  | 2.957   | 22.627  |

|     |        |       |       |       |       |        |
|-----|--------|-------|-------|-------|-------|--------|
| Dy2 | 24.039 | 1.137 | 6.133 | 4.937 | 2.821 | 21.925 |
| Dy3 | 23.701 | 1.018 | 6.345 | 4.738 | 2.822 | 21.708 |

HPY-7 ( $C_{6v}$ ): Hexagonal pyramid

PBPY-7 ( $D_{5h}$ ): Pentagonal bipyramid

COC-7 ( $C_{3v}$ ): Capped octahedron

CTPR-7 ( $C_{2v}$ ): Capped trigonal prism

JPBPY-7 ( $D_{5h}$ ): Johnson pentagonal bipyramid J13

JETPY-7 ( $C_{3v}$ ): Johnson elongated triangular pyramid J7

**Table S4.** Deviations ( $\text{\AA}$ ) from the ideal plane defined by five coordination atoms for **1-3**. The positive value denotes that the atom is located on the same side of the Ln atom, whereas a negative value denotes that the atom is located on the opposite side.

|                  | <b>1</b> |         | <b>2</b> |         | <b>3</b> |         |
|------------------|----------|---------|----------|---------|----------|---------|
| Coordination     | N1       | 0.0560  | N1       | -0.0323 | N1       | 0.1890  |
| atoms            | N2       | -0.0514 | N2       | 0.0445  | N2       | -0.2464 |
|                  | N3       | 0.0212  | N3       | -0.0359 | N3       | 0.1865  |
|                  | N4       | 0.0168  | N4       | 0.0127  | N4       | -0.0502 |
|                  | O1       | -0.0426 | O1       | 0.0111  | O4       | -0.0788 |
| r.m.s. deviation | 0.0408   |         | 0.0303   |         | 0.1673   |         |

**Table S5** charge distributions for ligand atoms used as input for Magellan (the partial charges of the donor atoms were estimated based on the literature and used in the input file)<sup>[1]</sup>.

|     | <b>1</b> |  | <b>2</b> |       | <b>3</b> |       |
|-----|----------|--|----------|-------|----------|-------|
| Dy1 | 3        |  | Dy1      | 3     | Dy1      | 3     |
| Cl1 | -0.85    |  | Cl1      | -0.85 | O1       | -0.85 |
| Cl2 | -0.85    |  | Cl2      | -0.85 | O6       | -0.85 |
| O1  | -0.85    |  | O1       | -0.85 | O11      | -0.85 |
| N1  | -0.35    |  | N1       | -0.35 | N1       | -0.35 |
| N2  | -0.4     |  | N2       | -0.4  | N2       | -0.4  |
| N3  | -0.4     |  | N3       | -0.4  | N3       | -0.4  |
| N4  | -0.35    |  | N4       | -0.35 | N4       | -0.35 |

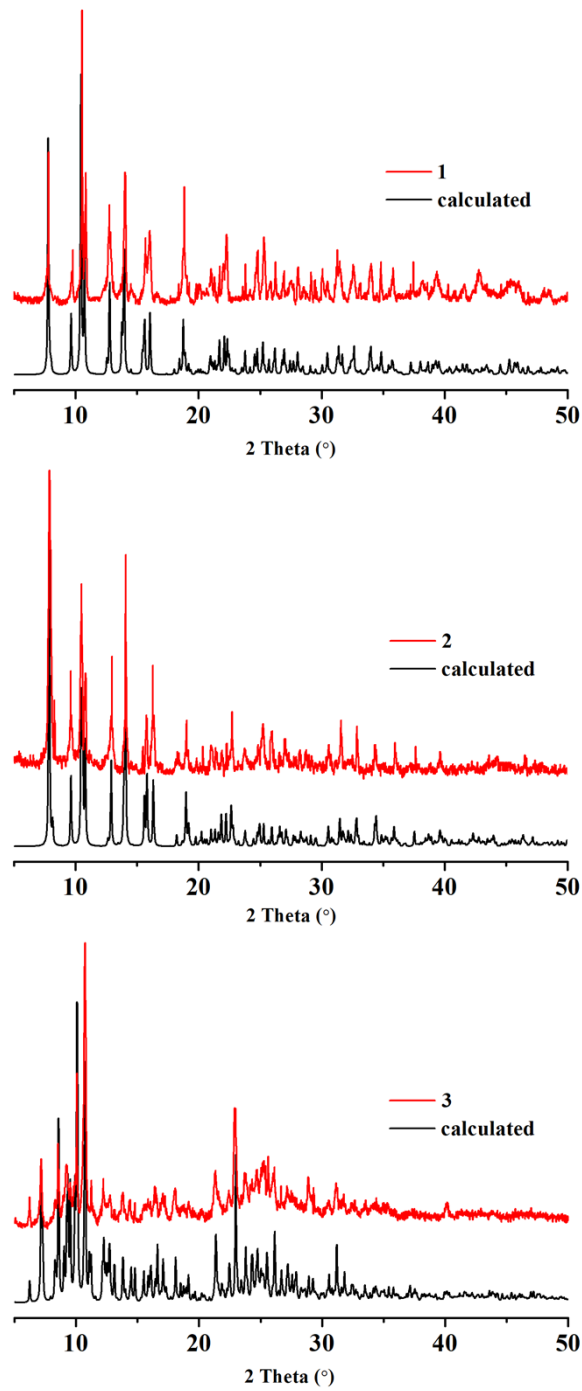

**Fig. S1** PXRD curves for 1-3.

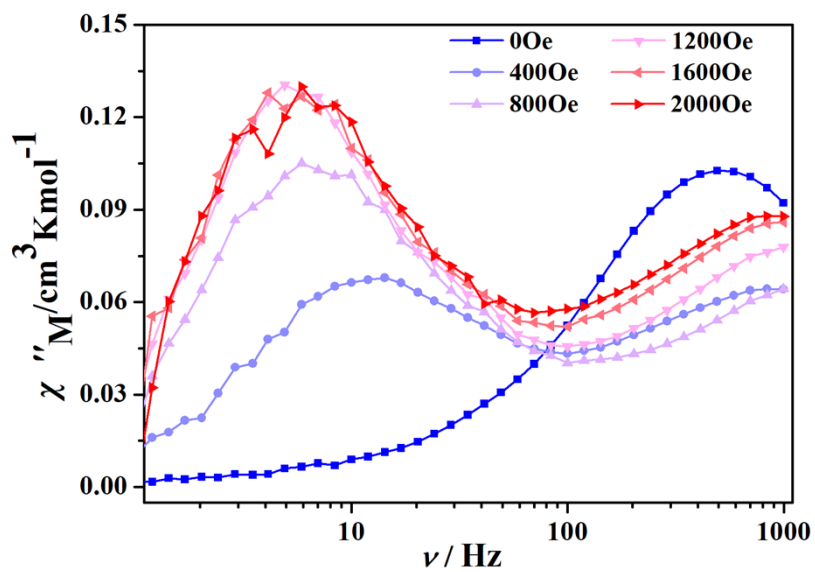

Fig. S2. Field dependence of the out-of-phase signal vs frequency at 8 K for 1.

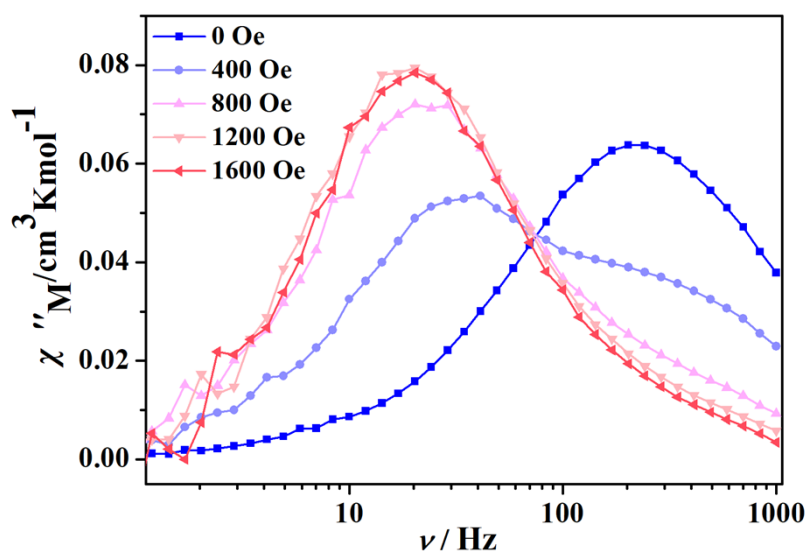

Fig. S3. Field dependence of the out-of-phase signal vs frequency at 8 K for 2.



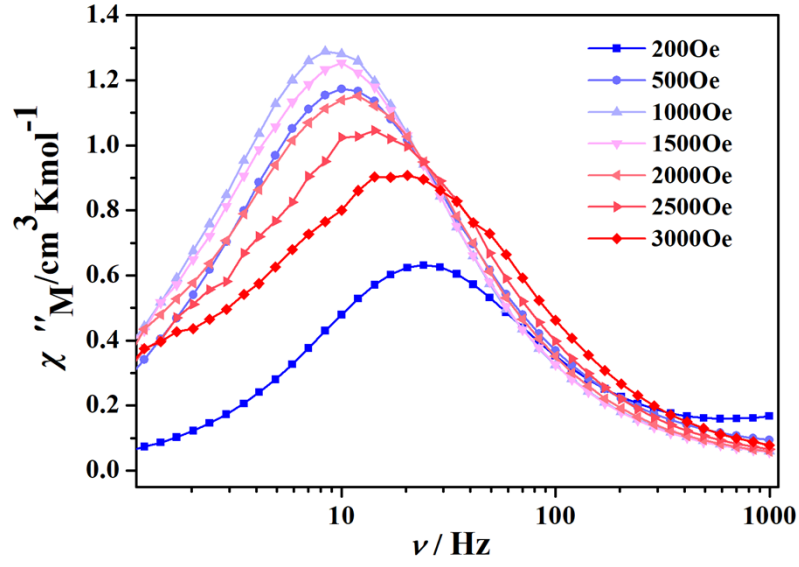

Fig. S4. Field dependence of the out-of-phase signal vs frequency at 8 K for 3.

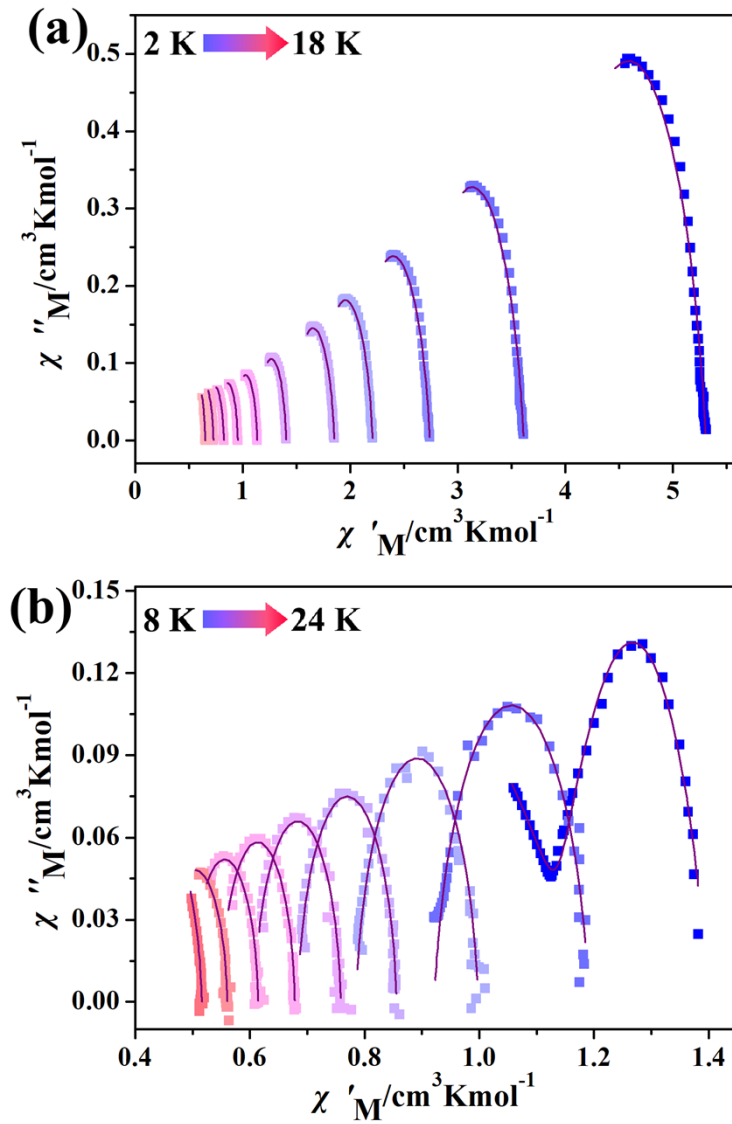

**Fig. S5** Cole-Cole plots using the frequency-dependence ac susceptibility data under (a) zero and (b) 1200 Oe dc field for **1**. The solid lines correspond to the best fits.

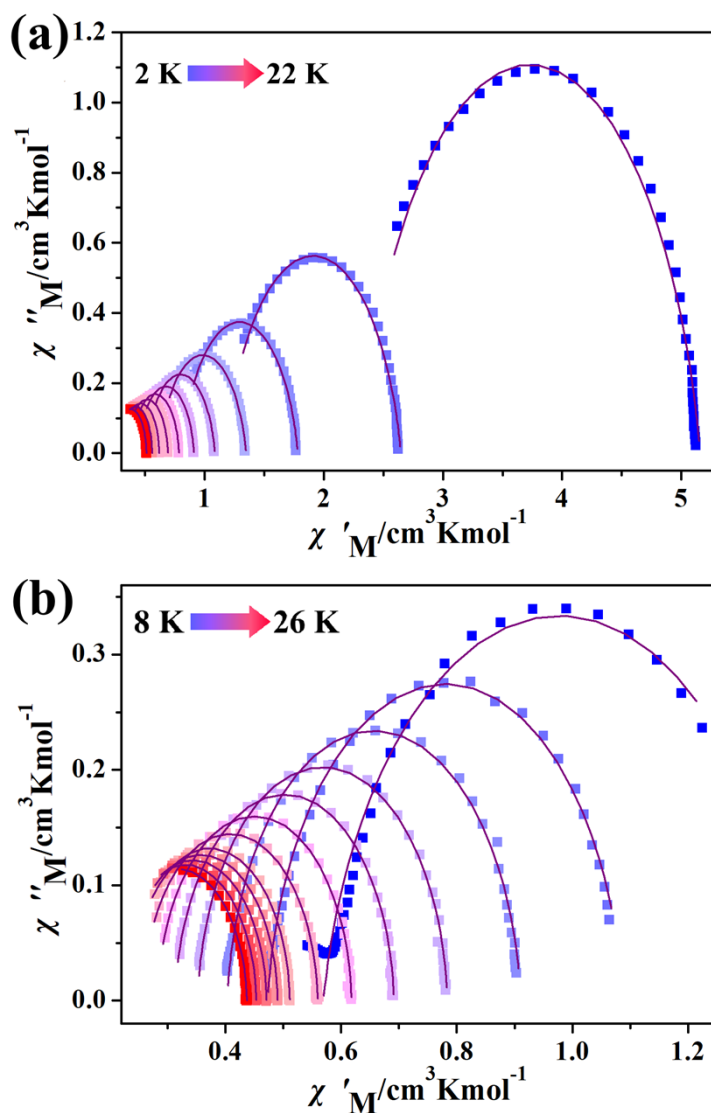

**Fig. S6** Cole-Cole plots using the frequency-dependence ac susceptibility data under (a) zero and (b) 1200 Oe dc field for **2**. The solid lines correspond to the best fits obtained by the generalized Debye model.

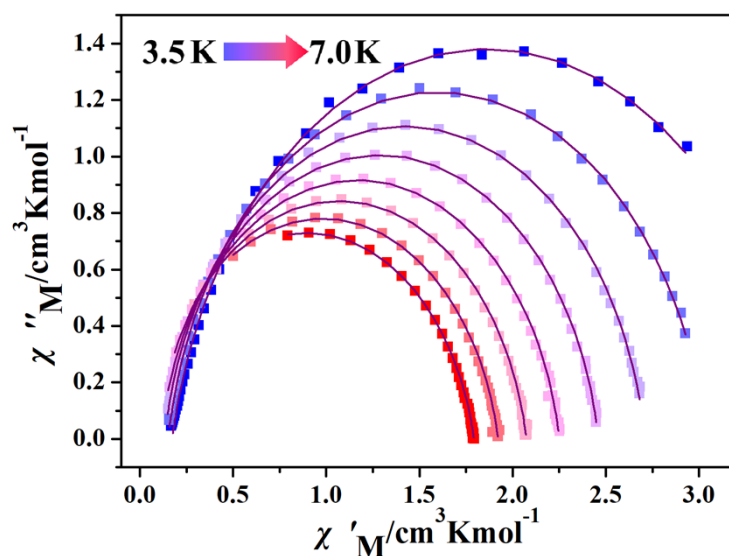

**Fig. S7** Cole-Cole plots using the frequency-dependence ac susceptibility data under 1000 Oe dc field for **3**. The solid lines correspond to the best fits obtained by the generalized Debye model.

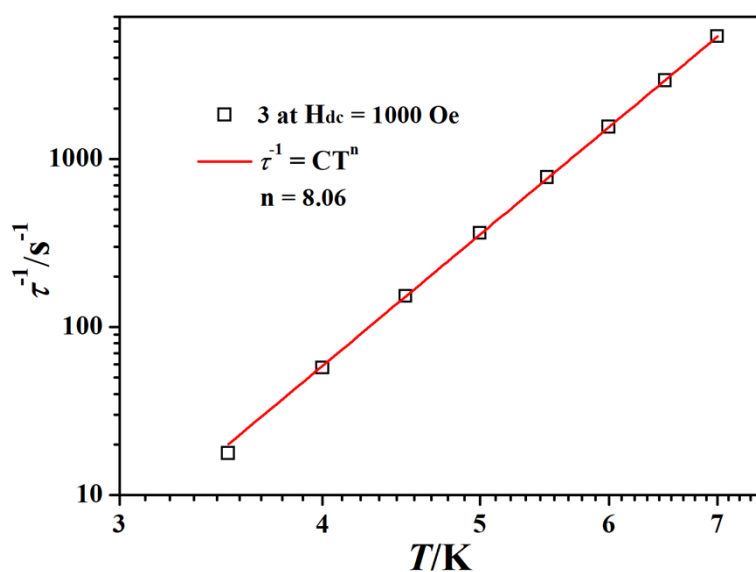

**Fig. S8** log-log plots of  $\tau^{-1}$  vs.  $T$  under 1000 Oe dc fields for **3**. The solid lines represent the best fit.

## References

- 1 H. Wu, M. Li, B. Yin, Z. Xia, H. Ke, Q. Wei, G. Xie, S. Chen and S. Gao, *Dalton trans.*, 2019, **48**, 16384-16394.
